# Supplementary material
Source: ML conference proceedings conference paper supplement (https://openreview.net/forum?id=e0szbHAF63)
Supplement: supplementary_material [file attachment]

---

# Supplementary Materials for Paper ID 17

## "Temporal-attentive Covariance Pooling Networks for Video Recognition"

---

Anonymous Author(s)

Affiliation

Address

email

### 1 A Details of Kinetics-400 and Mini-Kinetics-200

2 Kinetics-400 [1] is a large-scale dataset containing 400 action categories, in which training set and  
3 validation set have 246K and 20K videos, respectively. The dataset is released by providing YouTube  
4 links. Because some links are broken, we use the dataset collected by [2], which has 234,643 and  
5 19,761 videos for training and validation in total, respectively.

6 Mini-Kinetics-200 [3] dataset involving of 200 categories is a subset of Kinetics-400, where 400 and  
7 25 videos are used for training and validation per category, respectively. We use the same categories  
8 and videos sampling strategy in [3]. The full dataset contains 80K training videos and 5K validation  
9 videos. Since broken links, we collect 77,161 and 4,988 videos for training and validation in total.

| $\kappa$      | 1    | 3    | 5    | 7    |
|---------------|------|------|------|------|
| Top-1 Acc (%) | 75.6 | 76.0 | 76.1 | 76.0 |
| Top-5 Acc (%) | 92.5 | 92.7 | 92.7 | 92.6 |

Table A1: Results (8 frames) of TCPNet based on 2D ResNet50 with various  $\kappa$  on Mini-K200.

| $\kappa$      | 1    | 3    | 5    | 7    | 9    | 11   | 13   | 15   |
|---------------|------|------|------|------|------|------|------|------|
| Top-1 Acc (%) | 77.0 | 77.0 | 77.4 | 77.5 | 77.7 | 77.3 | 76.9 | 76.8 |
| Top-5 Acc (%) | 93.0 | 93.1 | 93.3 | 93.3 | 93.5 | 93.1 | 93.0 | 93.0 |

Table A2: Results (16 frames) of TCPNet based on 2D ResNet50 with various  $\kappa$  on Mini-K200.

### 10 B Effect of Kernel Size $\kappa$ on TC-COV $_{\kappa}$

11 Our temporal covariance pooling TC-COV $_{\kappa}$  has a parameter, i.e., kernel size  $\kappa$ . Here we assess  
12 effect of kernel size  $\kappa$  on TC-COV $_{\kappa}$ . Specifically, we conduct experiments on Mini-K200, where 8  
13 frames or 16 frames of  $112 \times 112$  images are used as inputs. The experimental settings are consistent  
14 with those in Section 4.1, and the results using 1 clip  $\times$  1 crop are reported for comparison. For 8  
15 frames input, kernel size  $\kappa$  varies from 1 to 7. For 16 frames input,  $\kappa$  varies from 1 to 15. As listed in  
16 Table A1 and Table A2, TCPNet based on 2D ResNet50 with  $\kappa = 5$  and  $\kappa = 9$  respectively achieves  
17 the best results for 8 frames input and 16 frames input. They obtain 0.5% and 0.7% gains over those  
18 with  $\kappa = 1$ , respectively. These results show our temporal covariance pooling captures both intra-  
19 frame cross-correlation and inter-frame correlation, outperforming those only consider inter-frame

20 covariance pooling. The performance gradually decreases when  $\kappa > 5$  and  $\kappa > 9$ , interaction among  
21 too large range will bring side effect on performance, while increasing computation cost.

## 22 **References**

- 23 [1] J. Carreira and A. Zisserman. Quo vadis, action recognition? A new model and the Kinetics dataset. In  
24 *CVPR*, 2017.
- 25 [2] X. Wang, R. Girshick, A. Gupta, and K. He. Non-local neural networks. In *CVPR*, 2018.
- 26 [3] S. Xie, C. Sun, J. Huang, Z. Tu, and K. Murphy. Rethinking spatiotemporal feature learning: Speed-accuracy  
27 trade-offs in video classification. In *ECCV*, 2018.
